# Supplementary material
Source: MDPI journal article supplement (https://www.mdpi.com/1996-1073/5/9/3279)
Supplement: s1 [file s1]

*Correction*

**Correction: Long, H. *et al.* More Wind Power Integration with Adjusted Energy Carriers for Space Heating in Northern China. *Energies* 2012, 5, 3279–3294.**

Hongyu Long <sup>1,\*</sup>, Kunyao Xu <sup>2</sup>, Ruilin Xu <sup>3</sup>, Jianjun He <sup>3</sup>, Kai Wu <sup>4,\*</sup> and Li Guo <sup>4</sup>

<sup>1</sup> Postdoctoral Workstation of the Chongqing Electric Power Corporation, Chongqing 400015, China

<sup>2</sup> Chongqing Electric Power Corporation, Chongqing 400014, China

<sup>3</sup> Chongqing Electric Power Research Institute, Chongqing 401123, China

<sup>4</sup> State Key Laboratory of Electrical Insulation and Power Equipment, Xi'an Jiaotong University, Xi'an 710049, China

\* Authors to whom correspondence should be addressed; E-Mails: h.y.long2008@hotmail.com (H.L.); wukai@mail.xjtu.edu.cn (K.W.); Tel.: +86-23-6323-0486; Fax: +86-23-6323-0178.

*Received: 9 November 2012 / Published: 27 November 2012*

---

In the original version of the article published in *Energies* [1], insufficient acknowledgement was given for the contributors Mr. Li Guo and Prof. Kai Wu in Xi'an Jiaotong University. The main work was completed by the research group in Xi'an Jiaotong University led by Prof. Kai Wu. Mr. Li Guo was his master student who gave a lot of efforts in the measurement of daily loads of heating and electricity in different families, and his data was used in Section 2.1. Prof. Kai Wu was involved in the whole work; he put forward the basic idea, made the research plan and participated in the detailed discussion about the algorithm for calculation.

Furthermore, Kai Wu has been indicated as the second corresponding author, since he was the leader of the research group completing this paper work. He was involved in the whole work as stated above. Besides, he contributed to the article writing and revision as well, and was the corresponding author of the former version of this paper which was rejected by the journal.

The correct author list and affiliations are provided below:

**Hongyu Long**<sup>1,\*</sup>, **Kunyao Xu**<sup>2</sup>, **Ruilin Xu**<sup>3</sup>, **Jianjun He**<sup>3</sup>, **Kai Wu**<sup>4,\*</sup> and **Li Guo**<sup>4</sup>

<sup>1</sup> Postdoctoral Workstation of the Chongqing Electric Power Corporation, Chongqing 400015, China

<sup>2</sup> Chongqing Electric Power Corporation, Chongqing 400014, China

<sup>3</sup> Chongqing Electric Power Research Institute, Chongqing 401123, China

<sup>4</sup> State Key Laboratory of Electrical Insulation and Power Equipment, Xi'an Jiaotong University, Xi'an 710049, China

We apologize for any inconvenience caused to the readers.

## **References**

1. Long, H.; Xu, K.; Xu, R.; He, J. More Wind Power Integration with Adjusted Energy Carriers for Space Heating in Northern China. *Energies* **2012**, *5*, 3279–3294.

© 2012 by the authors; licensee MDPI, Basel, Switzerland. This article is an open access article distributed under the terms and conditions of the Creative Commons Attribution license (<http://creativecommons.org/licenses/by/3.0/>).
